# Supplementary material
Source: PubMed Central journal article supplement (PMC4325537)

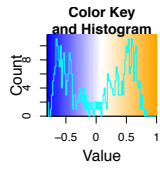

AK1 - Train

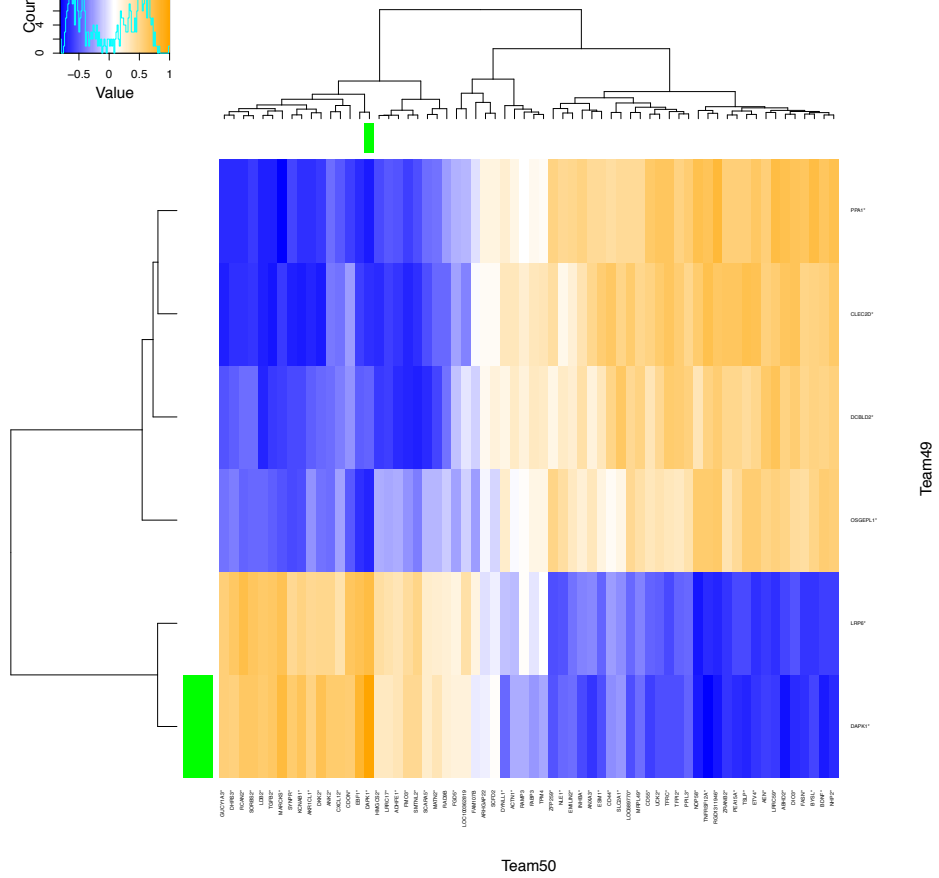

AK1 - Test

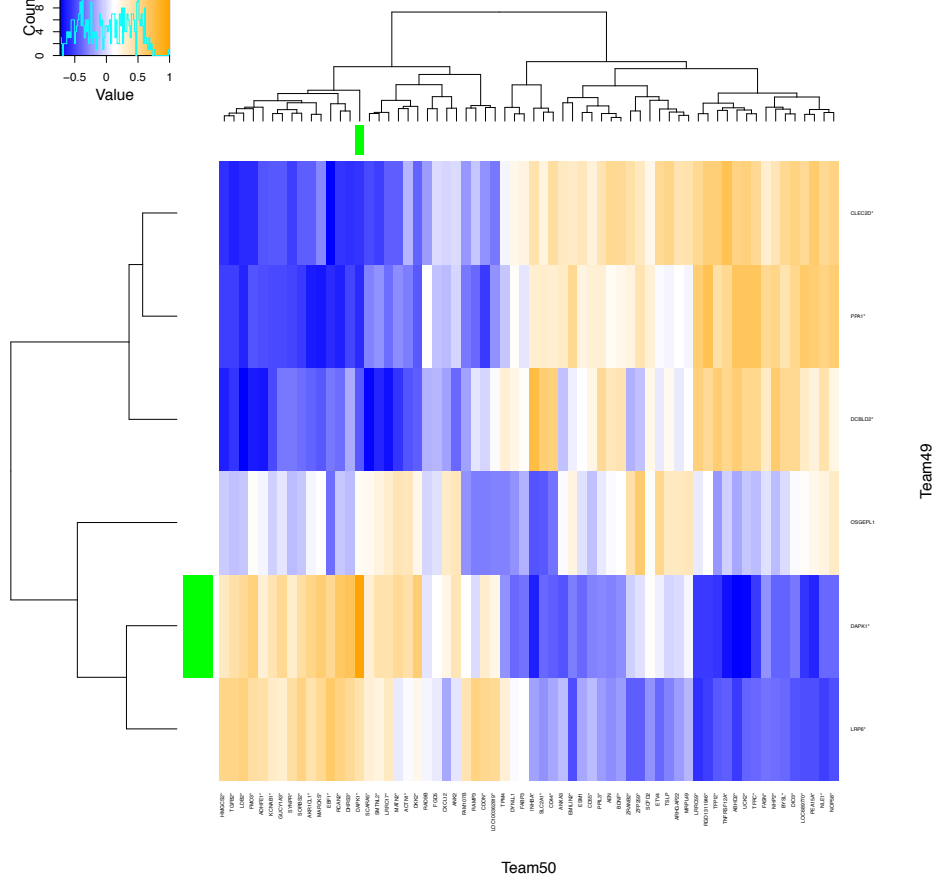

Team50

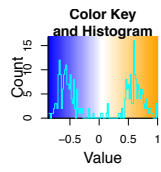

**CREB1 - Train**

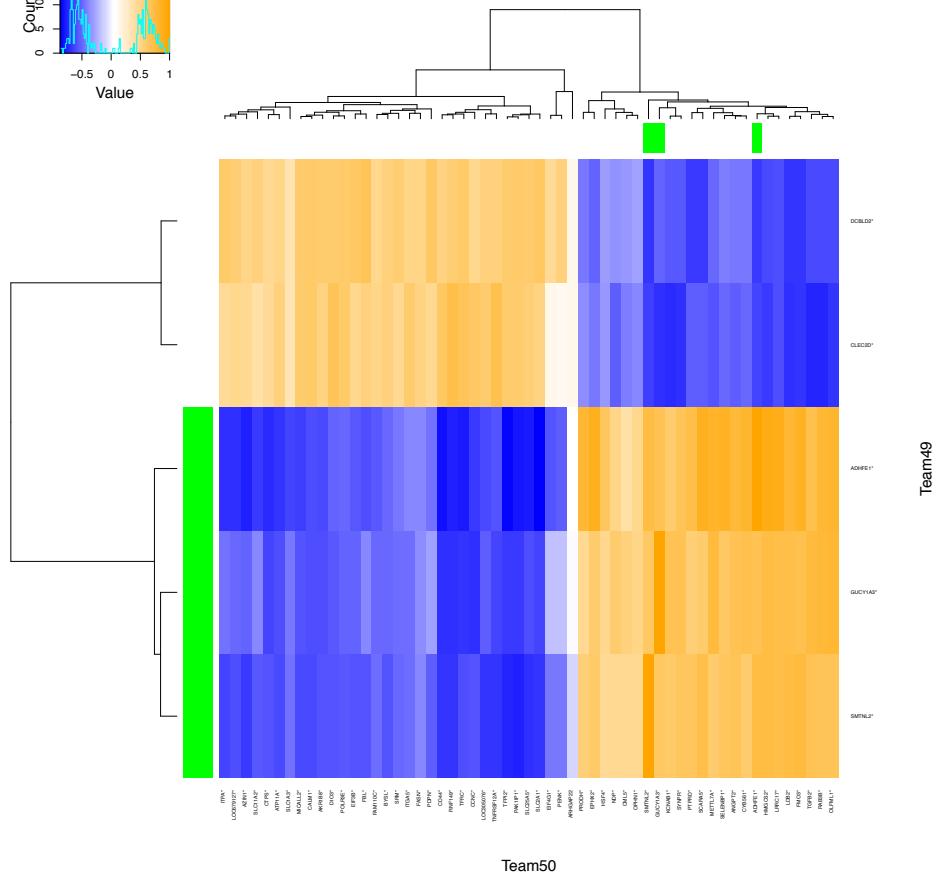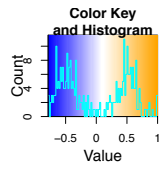

**CREB1 - Test**

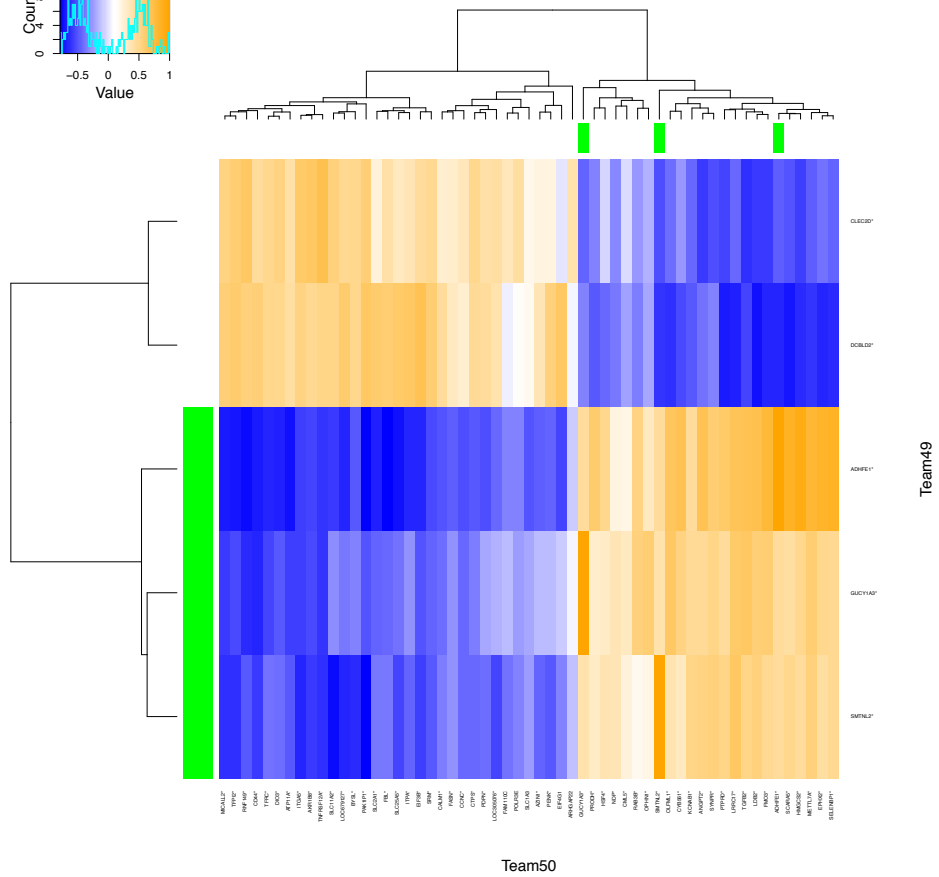

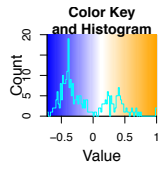

GSK3B - Train

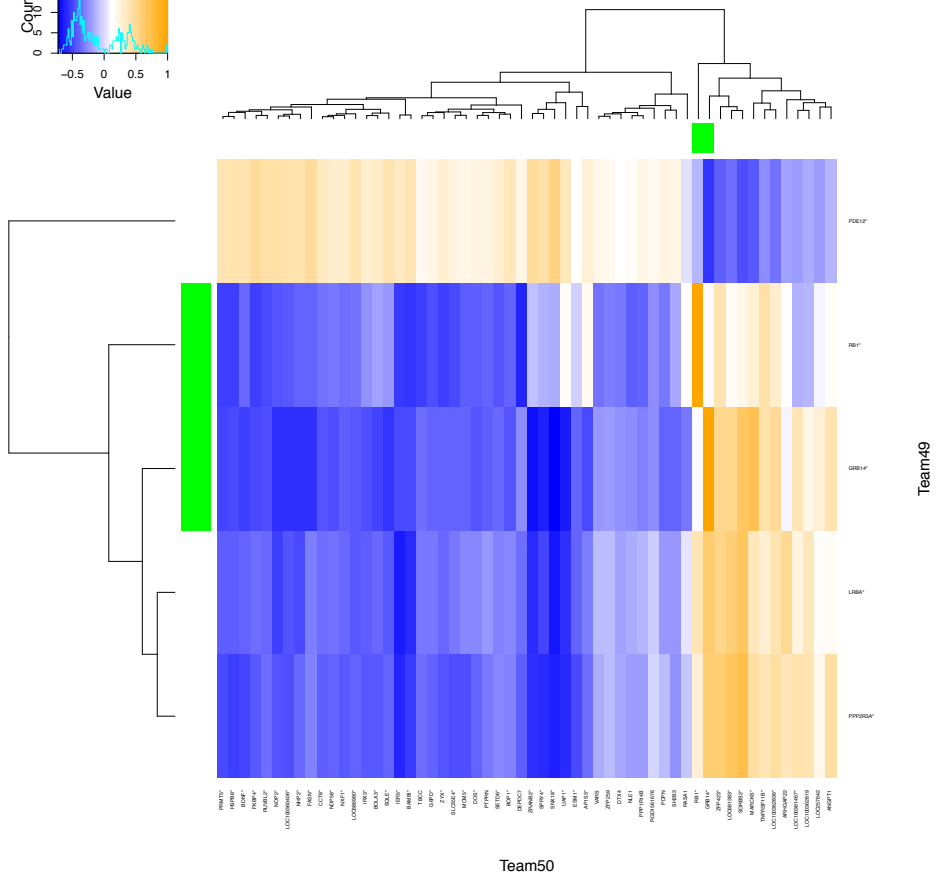

Team50

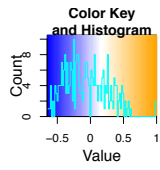

GSK3B - Test

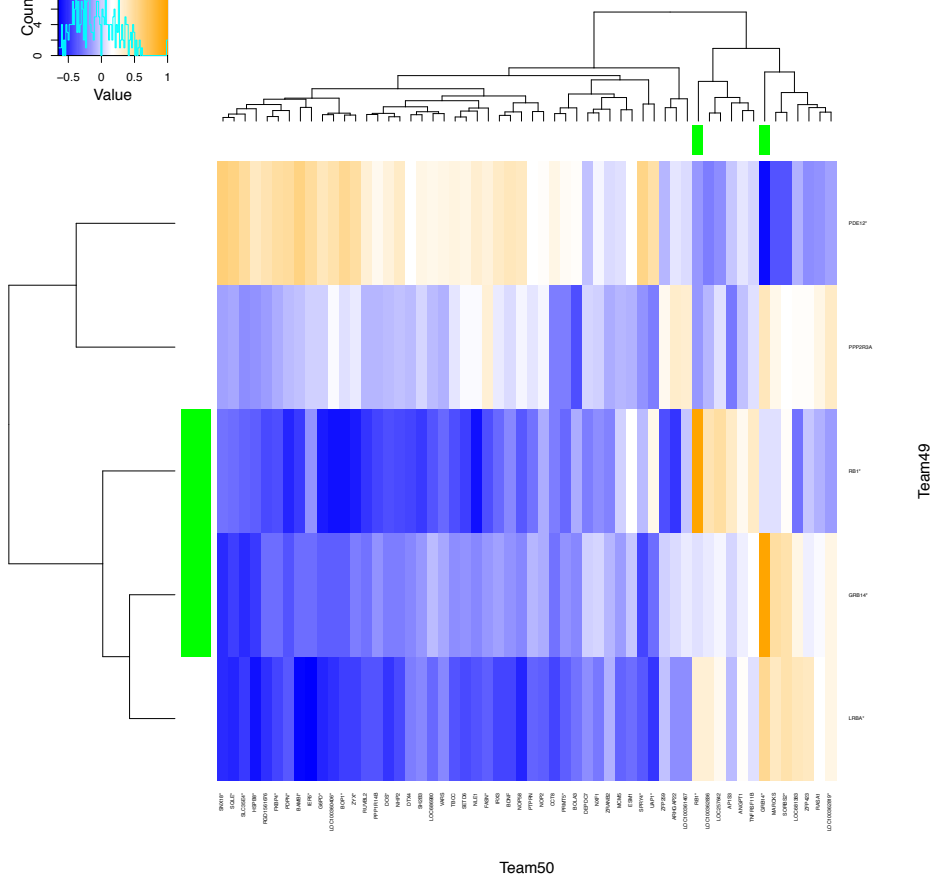

Team50



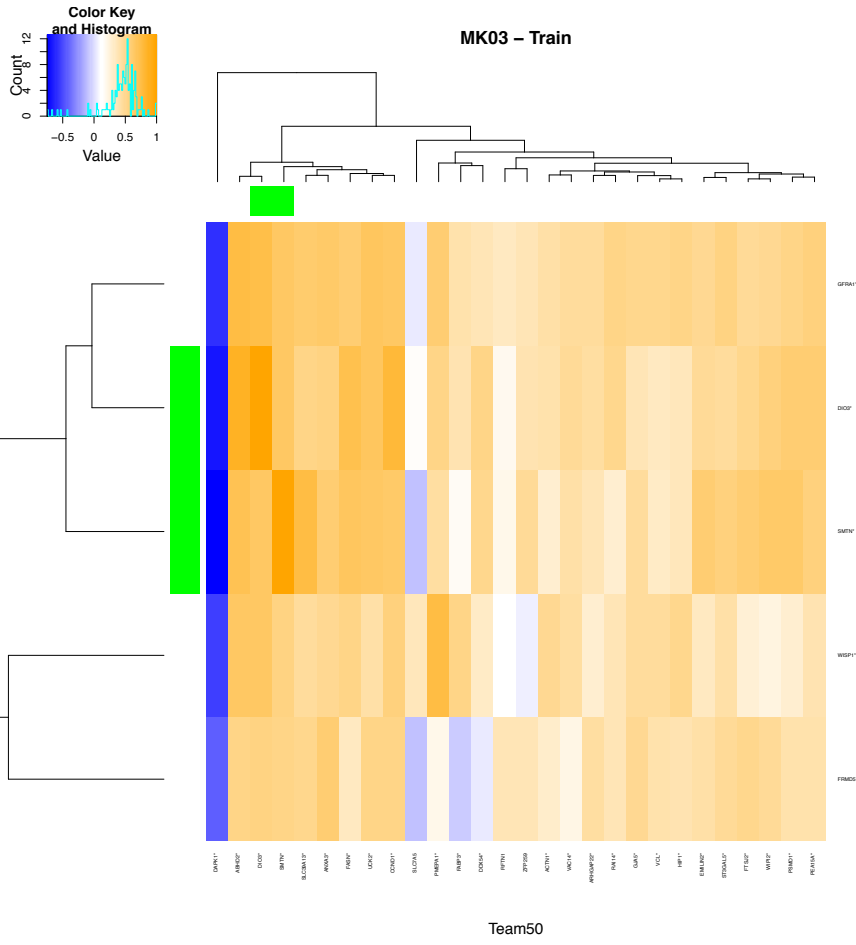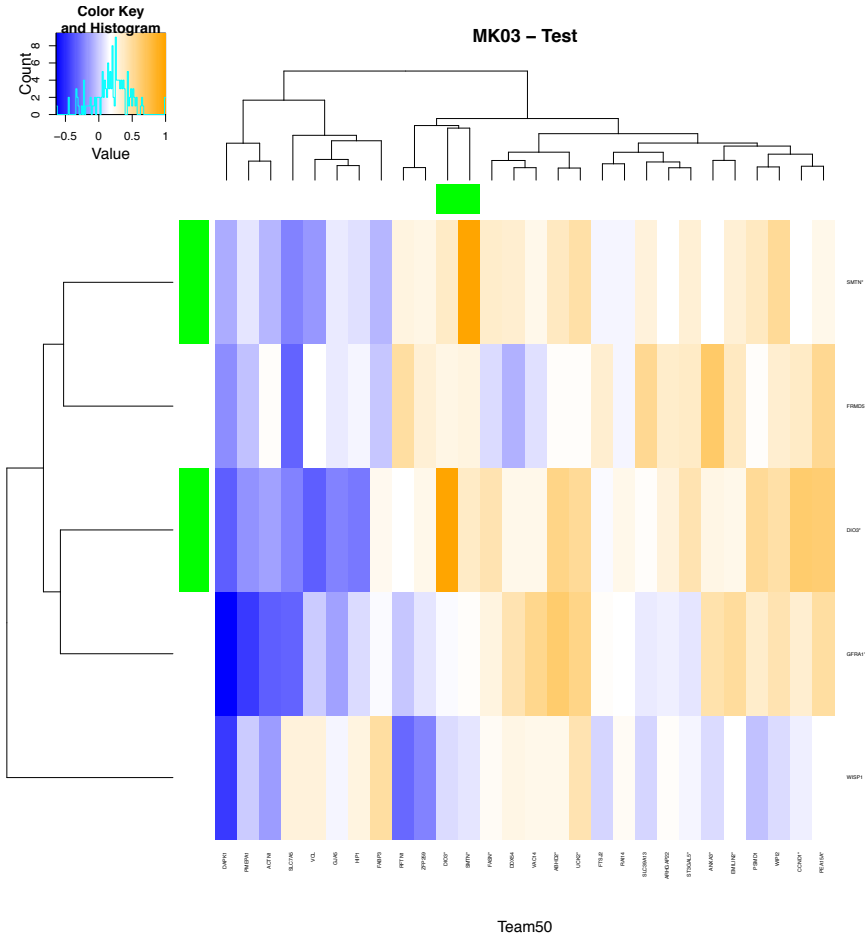

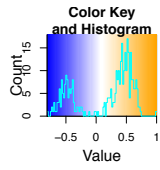

MK09 - Train

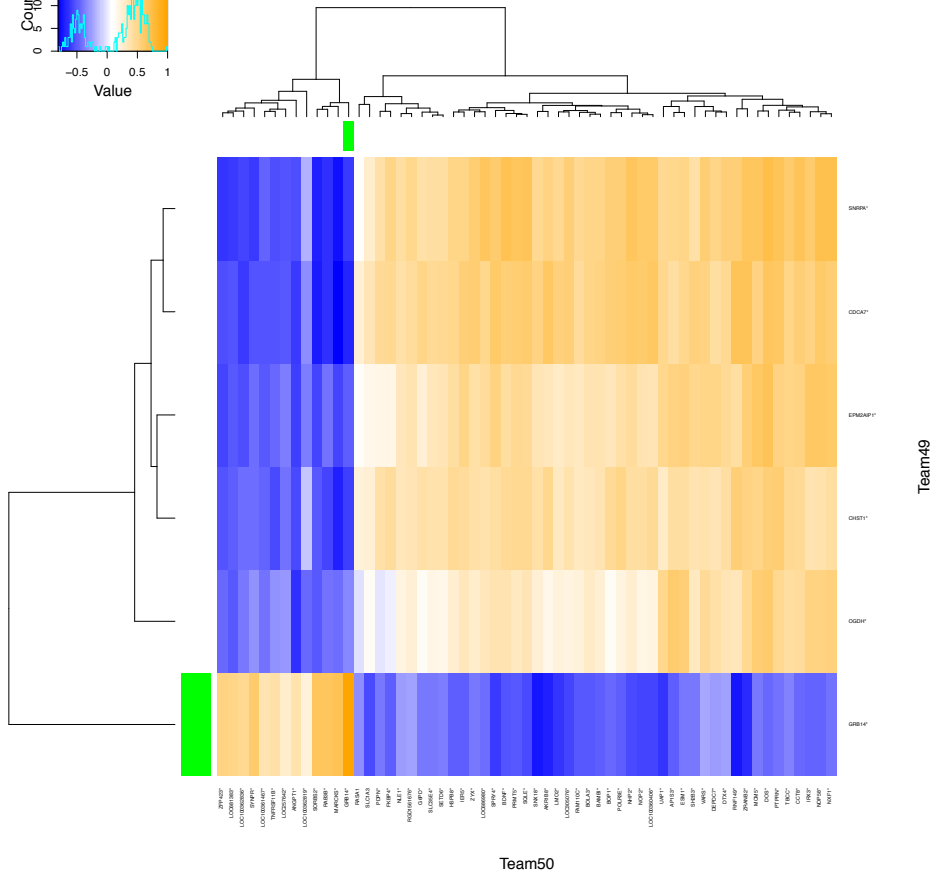

Team50

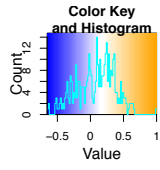

MK09 - Test

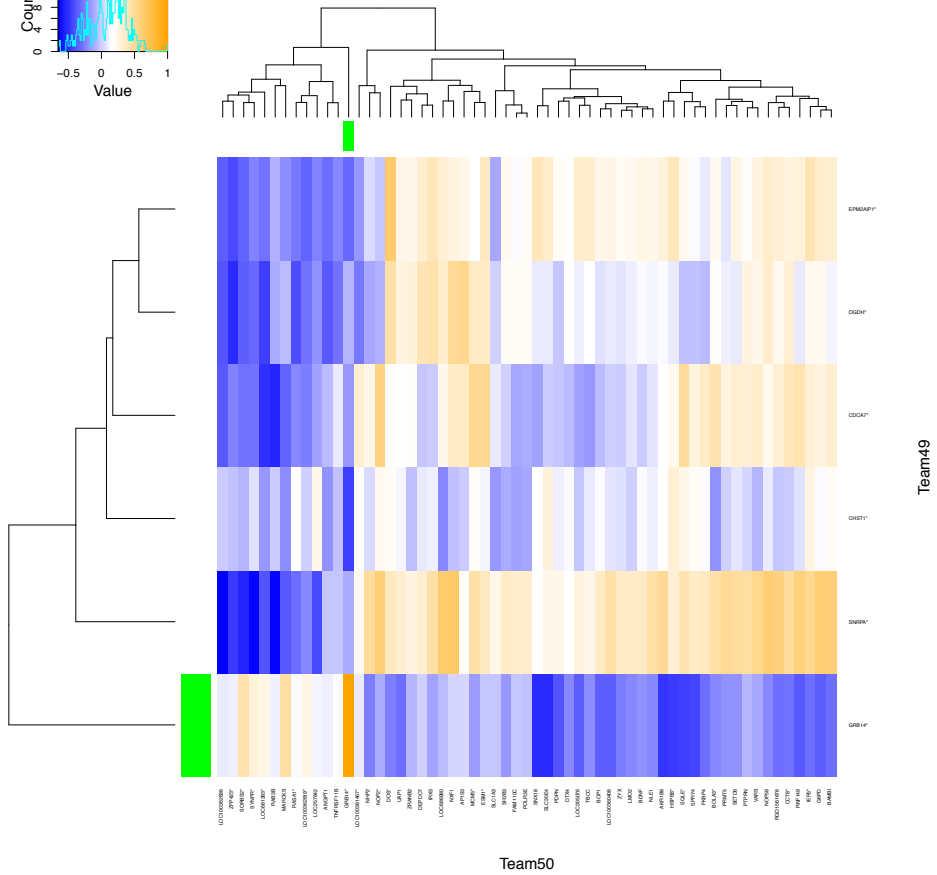

Team50

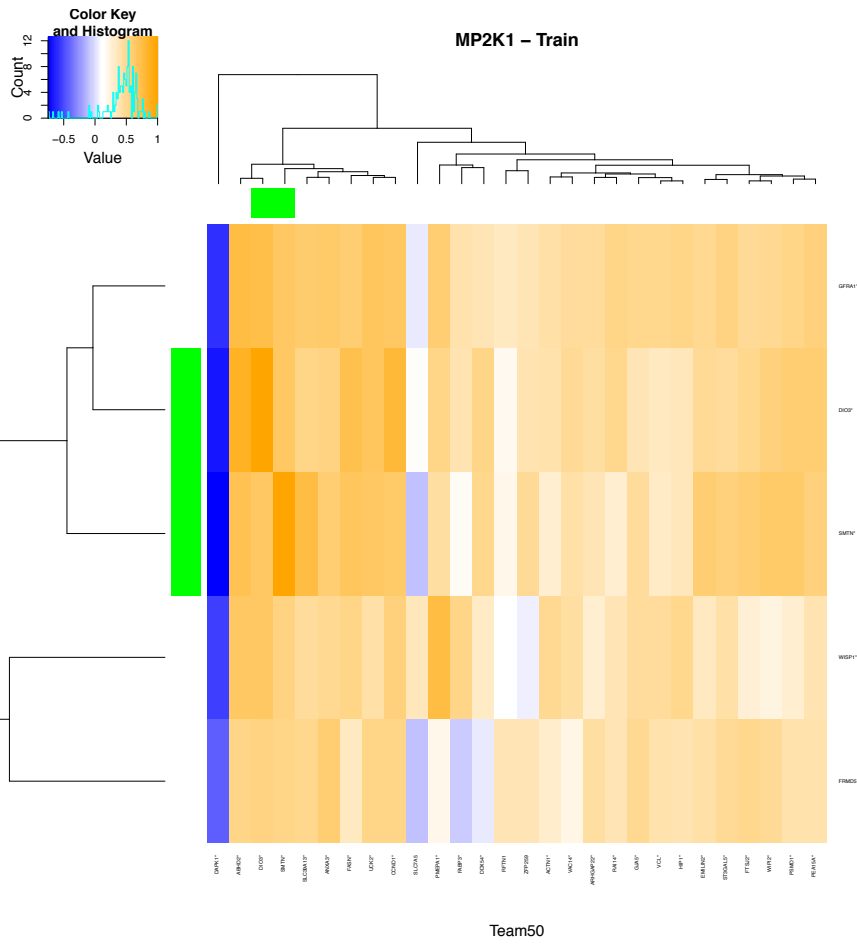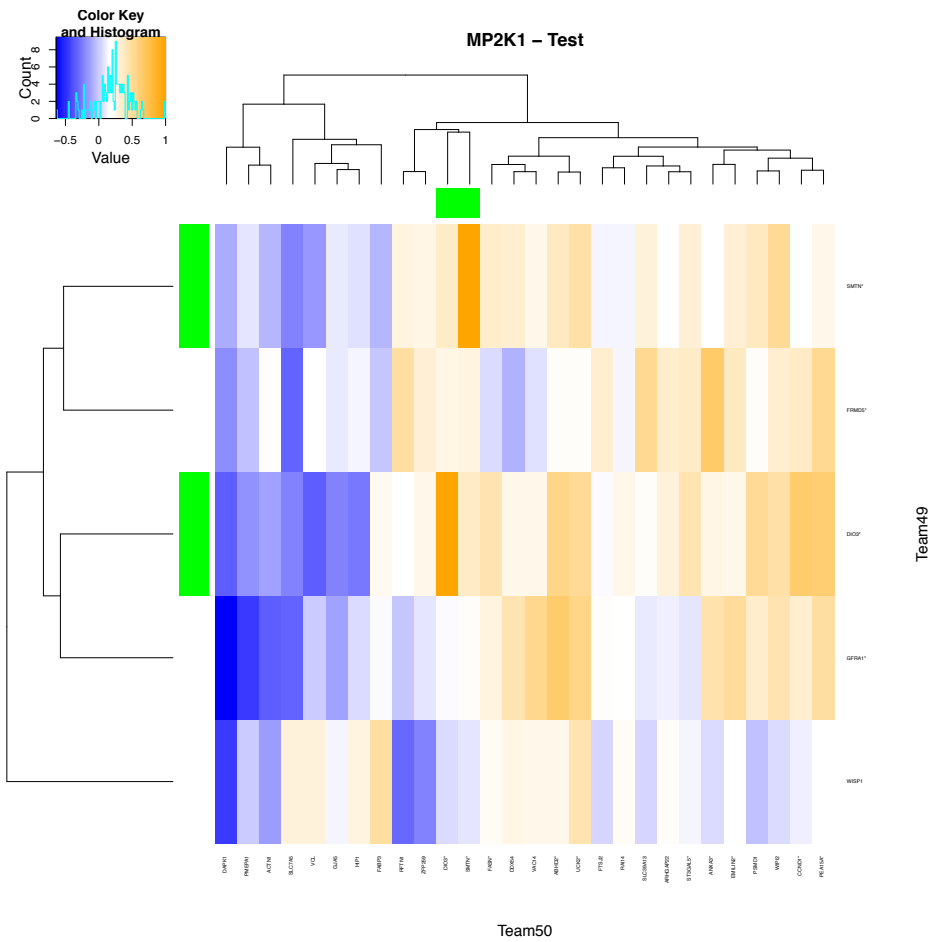

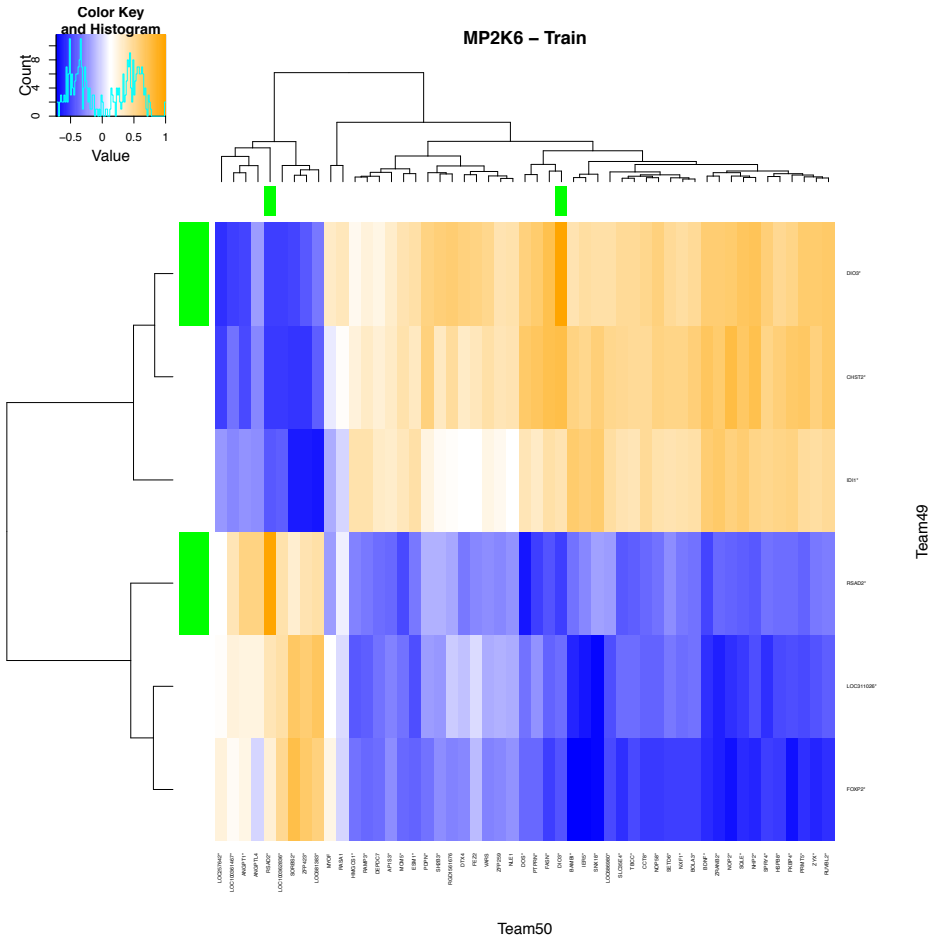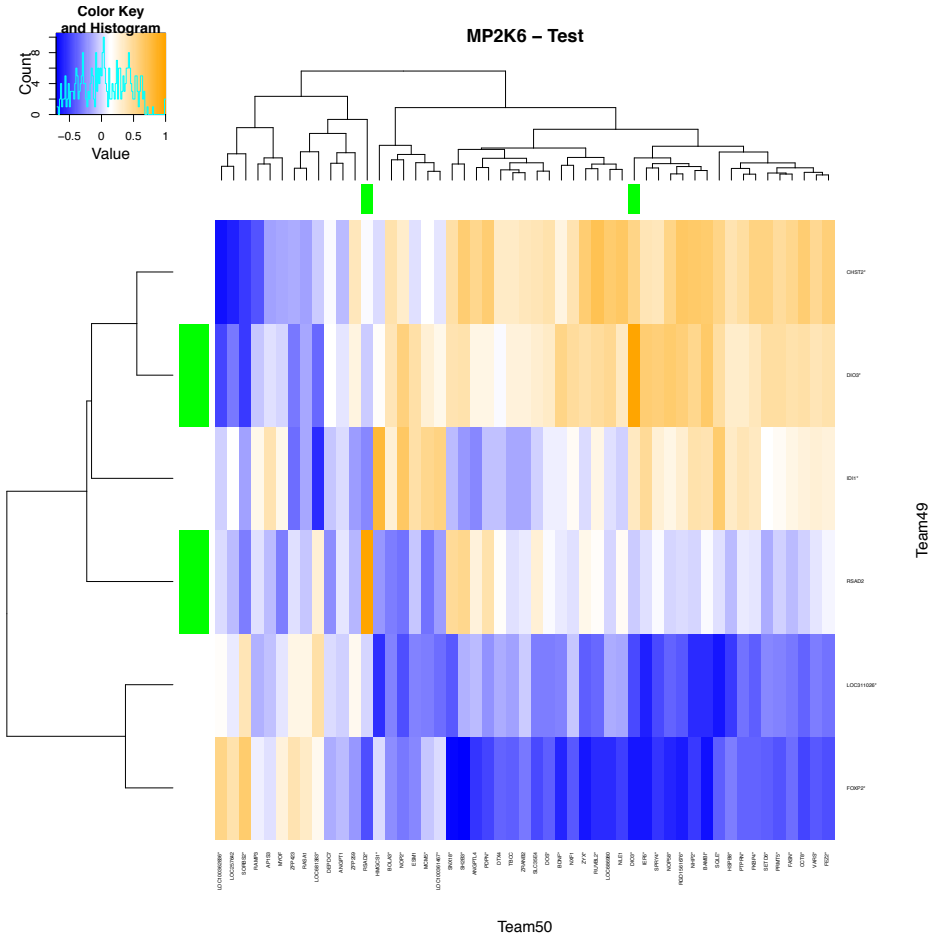



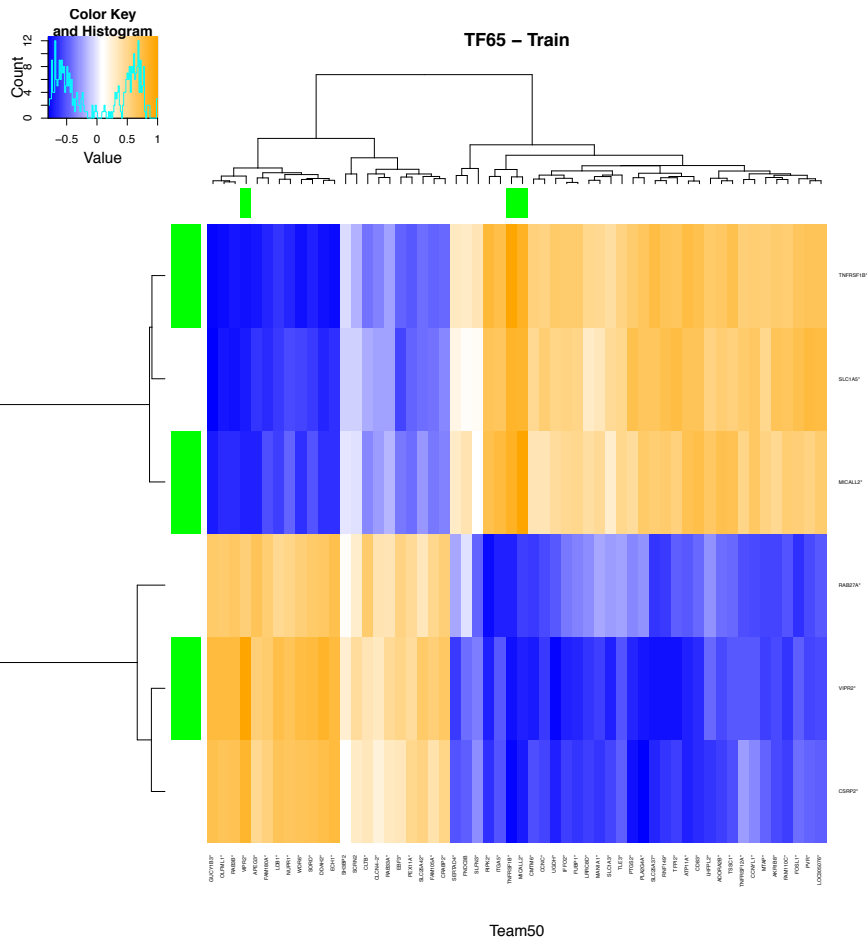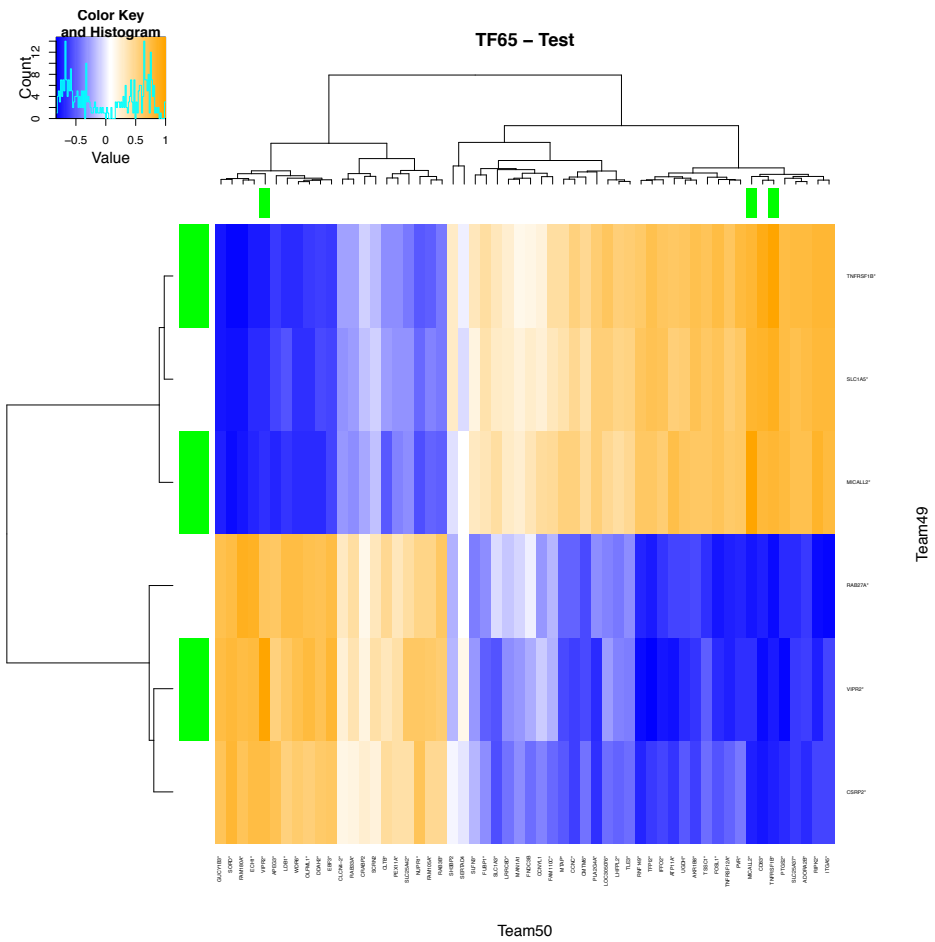

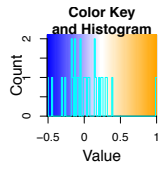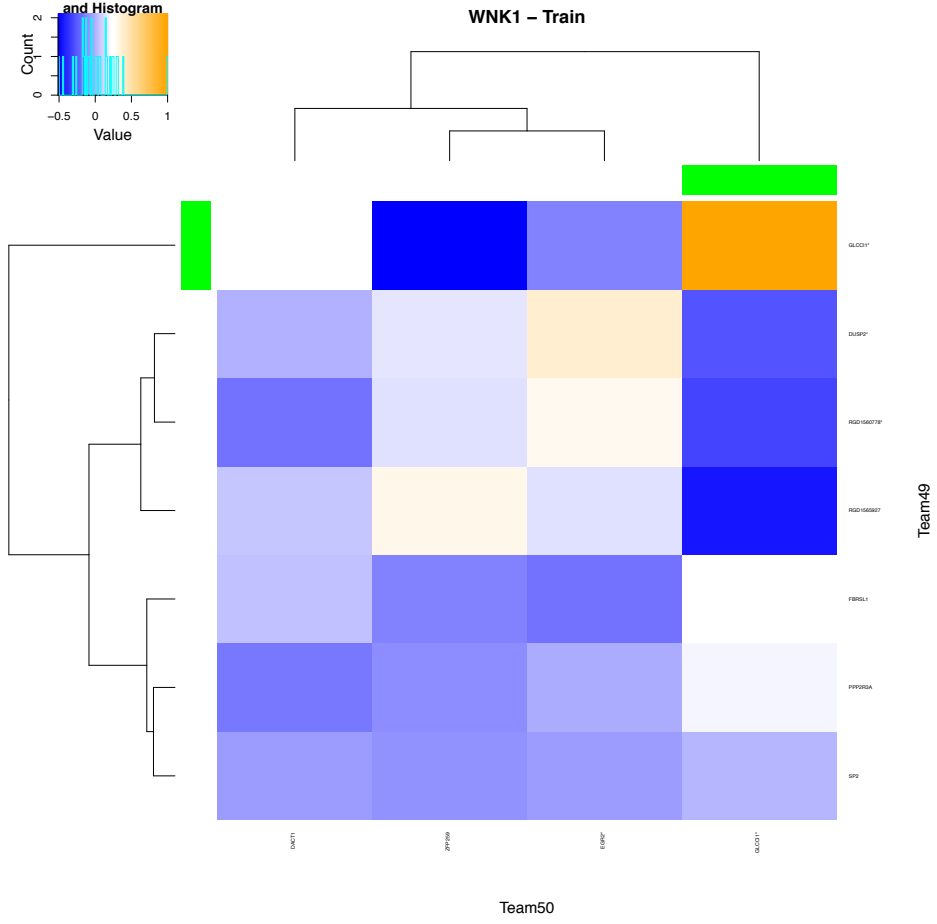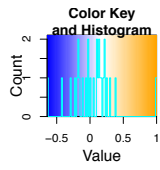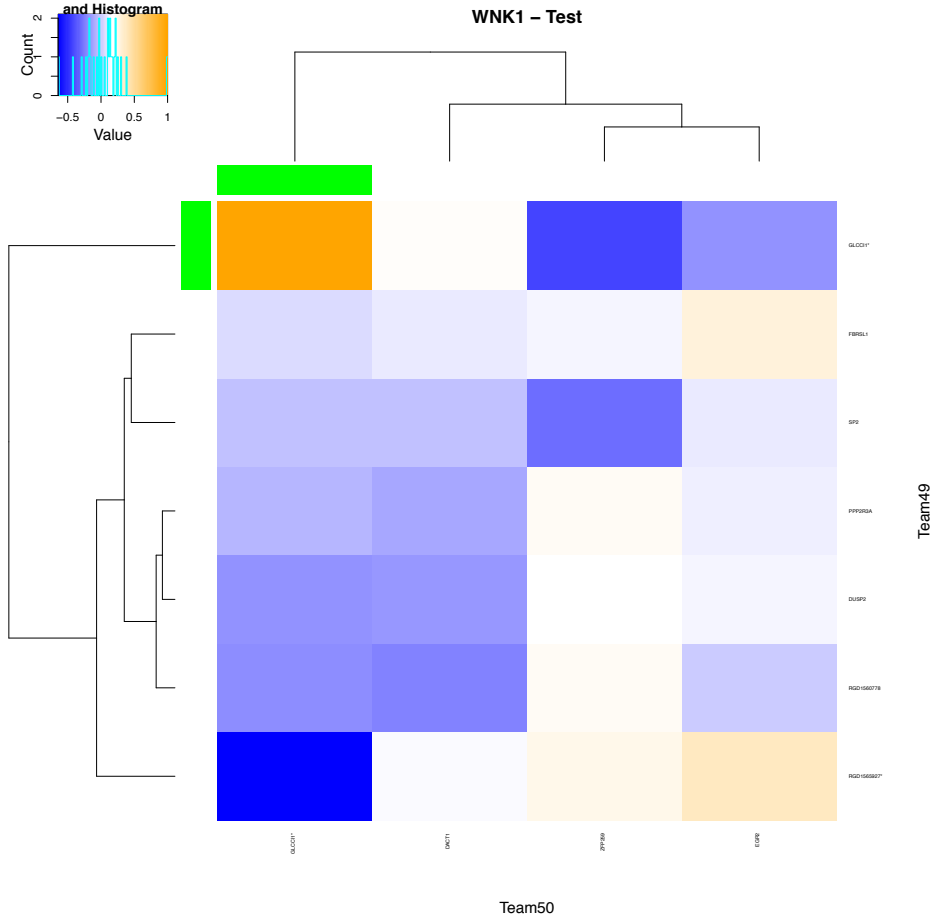

Supplement: supp_btu490_Figure_S2.pdf [file supp_btu490_Figure_S2.pdf]
