# Supplementary material
Source: PubMed Central journal article supplement (PMC4325537)
Supplement: supp_btu490_Figure_S1.pdf [file supp_btu490_Figure_S1.pdf]

**Color Key  
and Histogram**

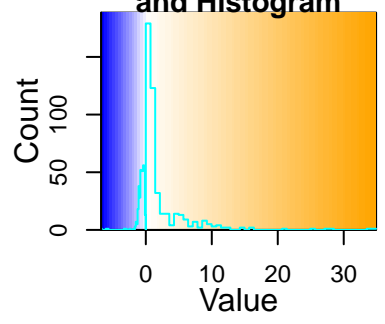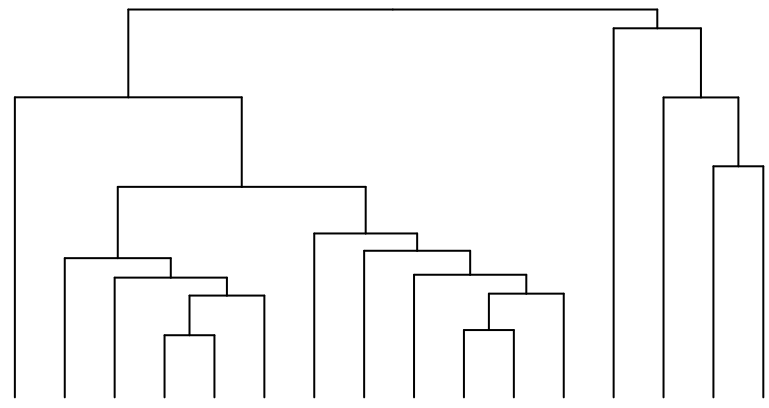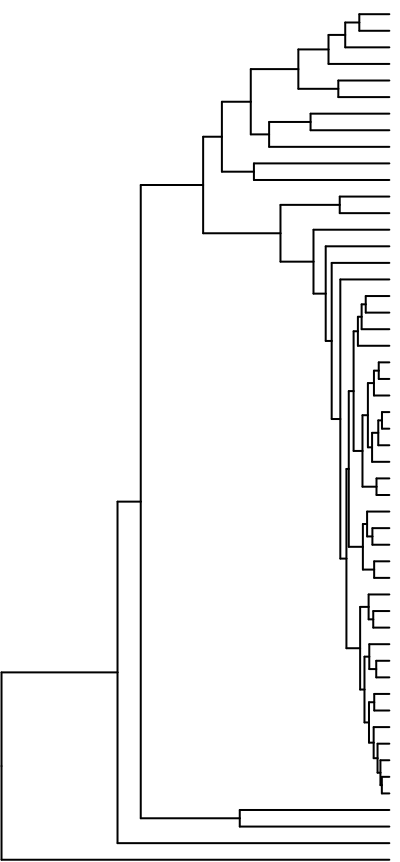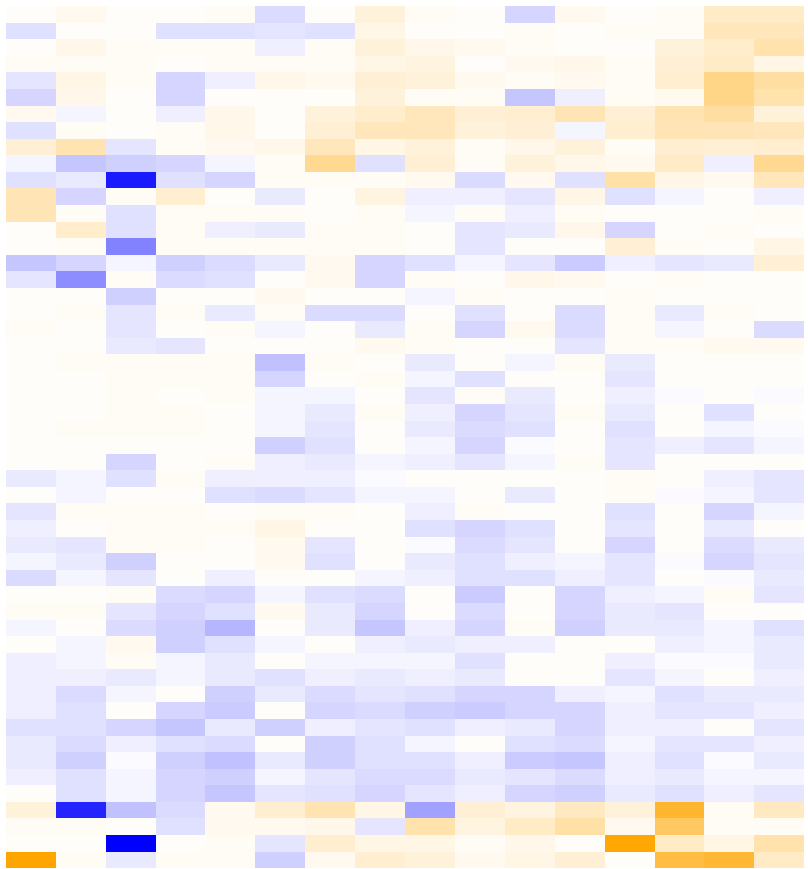

PTN11  
FAK1  
IKBA  
HSPB1  
KS6A1  
MK14K11  
MK09  
MK03  
MP2K6  
KS6B1  
GSK3B  
WNK1  
TF65  
AKT1  
MP2K1  
CREB1

MEPYRAMINE  
NISOXETINE  
SEROTONIN  
EGF  
PROMETHAZINE  
CLOMIPRAMINE  
TGFA  
PMA  
NACL  
FORSKOLIN  
TNFA  
IL11  
CNTF  
HIGHGLU  
FLAST  
HEXESTROL  
DIMETHYLOXALYLGLYCINE  
FSL1  
DEXAMETHASONE  
TAUROCHOLIC\_ACID  
CARBACHOL  
NT3  
IGFII  
PROKINECTIN2  
HBEGF  
5AZA  
AMPHIREGULIN  
IL4  
ODN2006  
CHOLESTEROL  
BENPERIDOL  
BETAXOLOL  
CLENBUTEROL  
SHH  
FORMALDEHYDE  
TOLMETIN  
NORETHINDRONE  
BETAHISTINE  
CISAPRIDE  
POLYIC  
RILUZOLE  
RAPAMYCIN  
WISP3  
BISACODYL  
C12IE  
CCL3L  
FGF8  
IFNG  
EPIGALLOCATECHIN  
INS  
IL1B  
PDGFB
